# Supplementary material for: How Inclusive, User-Centered Design Research Can Improve Psychological Therapies for Psychosis: Development of SlowMo
Source: PubMed Central journal article supplement (PMC6300708; doi:10.2196/11222), 2018-12-05
Supplement: mental_v5i4e11222_app1.pdf [file mental_v5i4e11222_app1.pdf]

## Example Screenshots of Thinking Well Therapy

Powerpoint slides from session one including images of the out-of-session paper thought record ('Making a Habit of Thinking Well sheet') and practice plan card ('Thinking Well Habit card').

### What is Thinking Well?

- It is a 6 session talking therapy for people with upsetting thoughts about others
- It will involve learning steps to help you cope with your thoughts and get on with your life

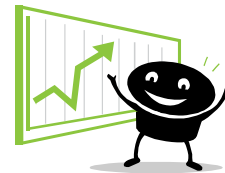

#### Module 1: Understanding Upsetting Thoughts

### Aims of Meeting 1:

To find out:

- Upsetting thoughts about other people are common
- How our thinking habits affect upsetting thoughts
- How to notice your upsetting thoughts and start improving your thinking habits

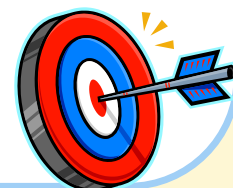

## We all have upsetting thoughts about others...

Click on the boxes to listen to examples of when these people have had an upsetting thought about others:

'John'

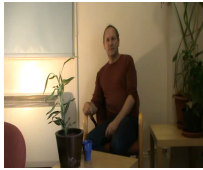

'Irene'

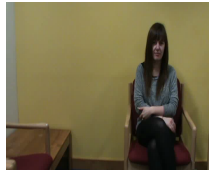

'Peter'

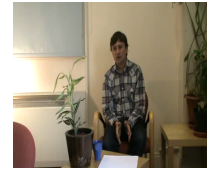

'Ben'

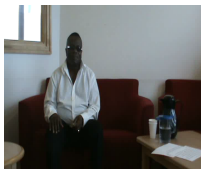

'Sandra'

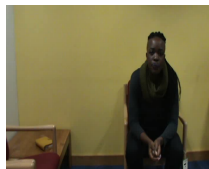

'Ali'

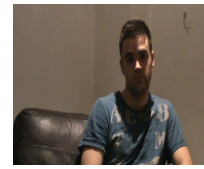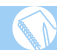

## What triggers off my upsetting thoughts?

For example: feelings, noises, sensations, other people's behaviour...

Write down what triggers your thoughts on the *"Understanding my Upsetting Thoughts & Thinking Habits"* sheet

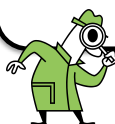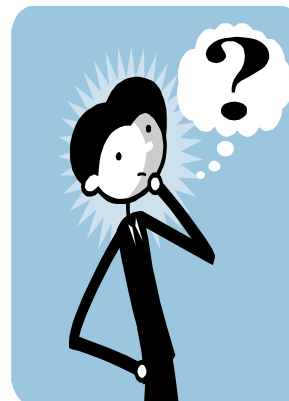

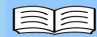

## Making a habit of thinking well...

- Make a note of what happens when you use the step on the *Making a Habit of Thinking Well sheet*
- We can talk about what you noticed next time!

**Making a Habit of Thinking Well 1**

Reminder of my Thinking Well goal:

When you notice yourself feeling upset or worried when trying to do something for your above goal, or in any other situation, record what happens in the table below.

Remember to use your new step to Thinking Well when you have an upsetting thought!

Notice your upsetting thoughts and thinking habits

|                                                                         | Example                                                                                   | My experience... |
|-------------------------------------------------------------------------|-------------------------------------------------------------------------------------------|------------------|
| <b>What happened?</b><br>                                               | I was walking down the road to go to the shops.                                           |                  |
| <b>What upsetting thoughts did you notice?</b>                          | I thought other people were looking at and talking about me negatively.                   |                  |
| <b>What thinking habits did you notice? Did you think fast or slow?</b> | I thought fast, I knew straightaway what was happening, and didn't think of alternatives. |                  |
| <b>How did the thoughts and thinking habits impact on you?</b>          | I felt really scared, and went back home as quickly as possible.                          |                  |

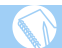

## Making a habit of thinking well...

- It is really helpful to practise using the Thinking Well steps outside our meetings
  - When and where will you practise the step?
  - Could anything get in the way of you practising?
  - What will help you practice?
- Make a note of how you will use the step on the other side of your *Thinking Well Habit Card*

How I will use the Thinking Well Step:

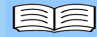

## Key Points: Module 1

- Everyone has upsetting thoughts about others sometimes
- We have two main ways of thinking, or *thinking habits* – *thinking fast* and *thinking slow*
- When we *think fast*, we make up our minds quickly, go with our instincts and don't look for more evidence, and do not tend to change our minds
- Thinking fast* can be helpful in some situations but it can mean we '*jump to conclusions*' and have an upsetting thought when we do not need to
- This programme will help you learn to improve your thinking habits so you can Think Well and feel better

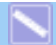

## My Weekly Ratings

Please answer the questions below about your worries over the past week:

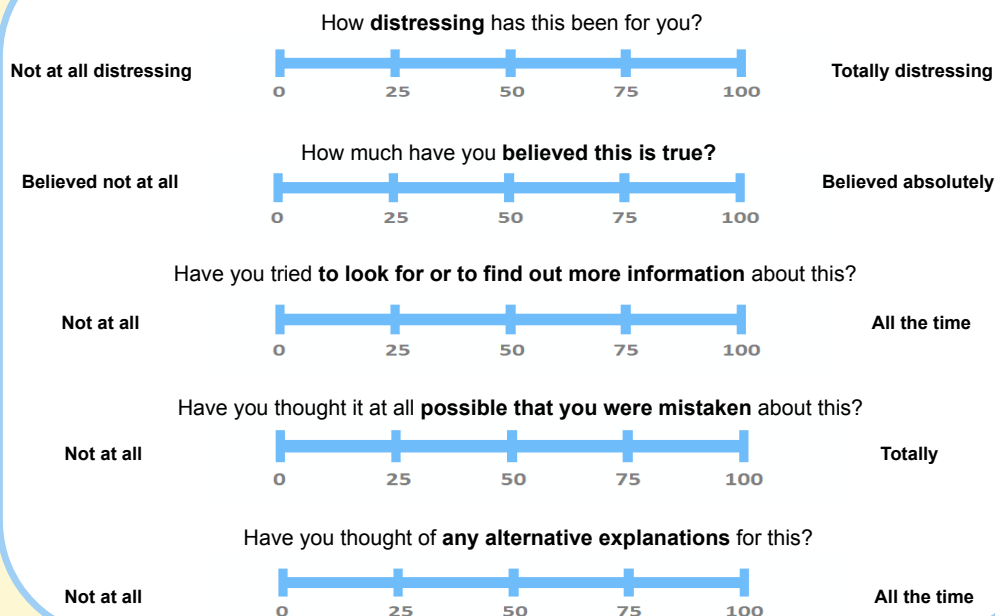

Example screenshots from the Thinking Well website for accessing therapy materials outside of sessions, including the homescreen, viewer for the session powerpoint slides, and digital thought record.

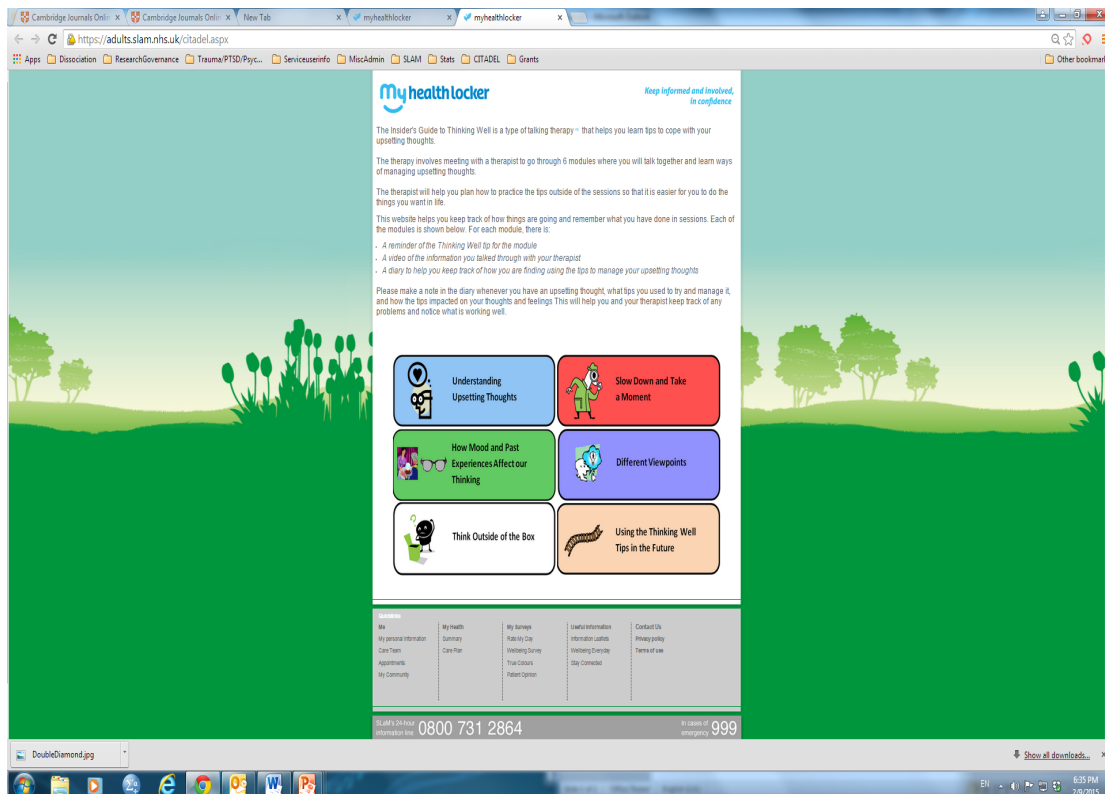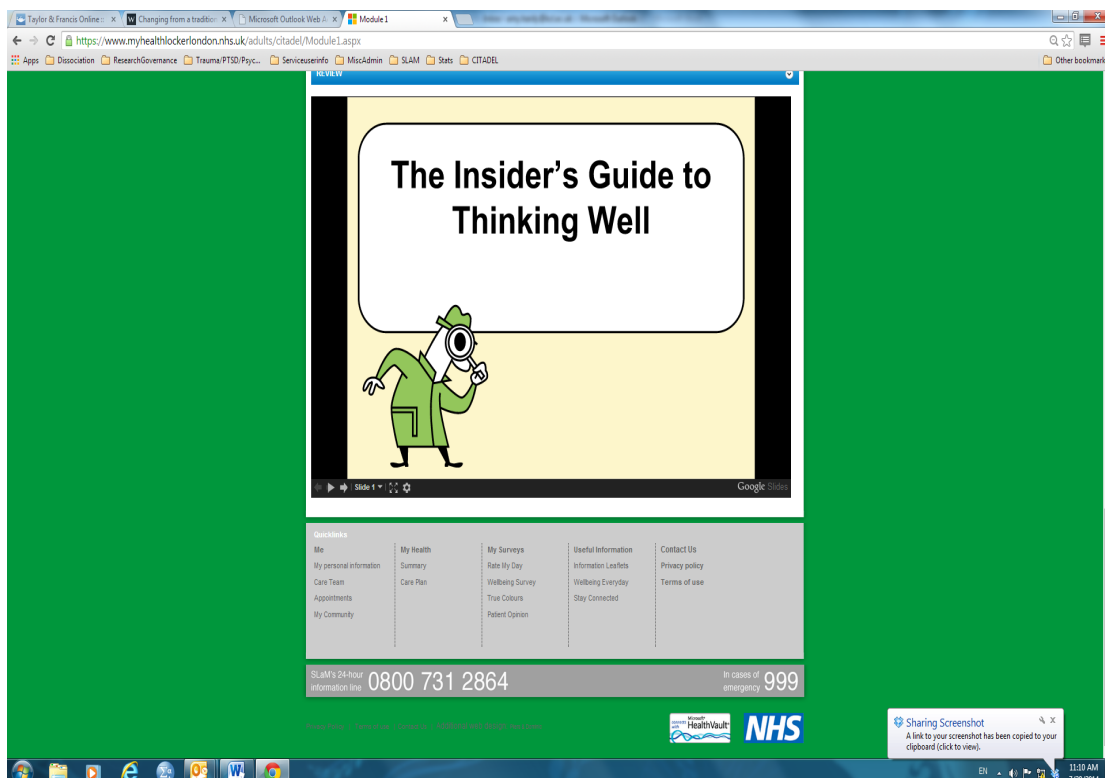

The screenshot shows a web browser window with the URL <https://adults.slam.nhs.uk/citadel/Module1.aspx>. The page is titled "My healthlocker" and features a navigation menu with links like Home, My Information, My Health, My Surveys, Take My Day, Research, Wellbeing, Community, and Feedback. A user is logged in as "Welcome, Sue-Khan".

The main content area has a green background with a landscape illustration. It contains the following text:  
"When you notice yourself *feeling upset or worried*, record what happens in the journal below."  
"Remember to use your new step to Thinking Well when you have an upsetting thought!"  
"Notice your upsetting thoughts and thinking habits."

Below this is a form titled "Module 1: Making a habit of Thinking Well". The form includes:  
- A "Date" field.  
- A "Time" field with a dropdown for AM/PM.  
- A section "WHAT HAPPENED?" with a large text area and a question mark icon. Example text: "e.g. I heard a noise in the night".  
- A section "WHAT WAS YOUR FIRST GUT REACTION?" with a large text area and a thought bubble icon. Example text: "e.g. A tingle in inside my house".  
- A section "WHAT COPING STRATEGY DID YOU TRY?" with a large text area and a hand icon. Example text: "e.g. I did slow breathing and told myself it will be o.k".  
- A section "DID THE THINKING WELL TIP CHANGE HOW YOU FELT?" with a large text area and two smiley face icons (one sad, one happy).

The Windows taskbar at the bottom shows the time as 6:39 PM on 2/8/2015.

This screenshot shows the same "Thinking Well" journal entry form from the MyHealthLocker website. The form is titled "Module 1: Making a habit of Thinking Well" and includes the same sections as the first screenshot:  
- "Date" field.  
- "Time" field with AM/PM dropdown.  
- "WHAT HAPPENED?" section with a question mark icon and example text: "e.g. I heard a noise in the night".  
- "WHAT WAS YOUR FIRST GUT REACTION?" section with a thought bubble icon and example text: "e.g. A tingle in inside my house".  
- "WHAT COPING STRATEGY DID YOU TRY?" section with a hand icon and example text: "e.g. I did slow breathing and told myself it will be o.k".  
- "DID THE THINKING WELL TIP CHANGE HOW YOU FELT?" section with two smiley face icons (one sad, one happy).

The Windows taskbar at the bottom shows the time as 11:10 AM on 7/28/2014.
