# Supplementary material for: How Inclusive, User-Centered Design Research Can Improve Psychological Therapies for Psychosis: Development of SlowMo
Source: PubMed Central journal article supplement (PMC6300708; doi:10.2196/11222), 2018-12-05
Supplement: mental_v5i4e11222_app3.pdf [file mental_v5i4e11222_app3.pdf]

# Outputs from the *Develop* Phase of the Design Research

Concept generation.

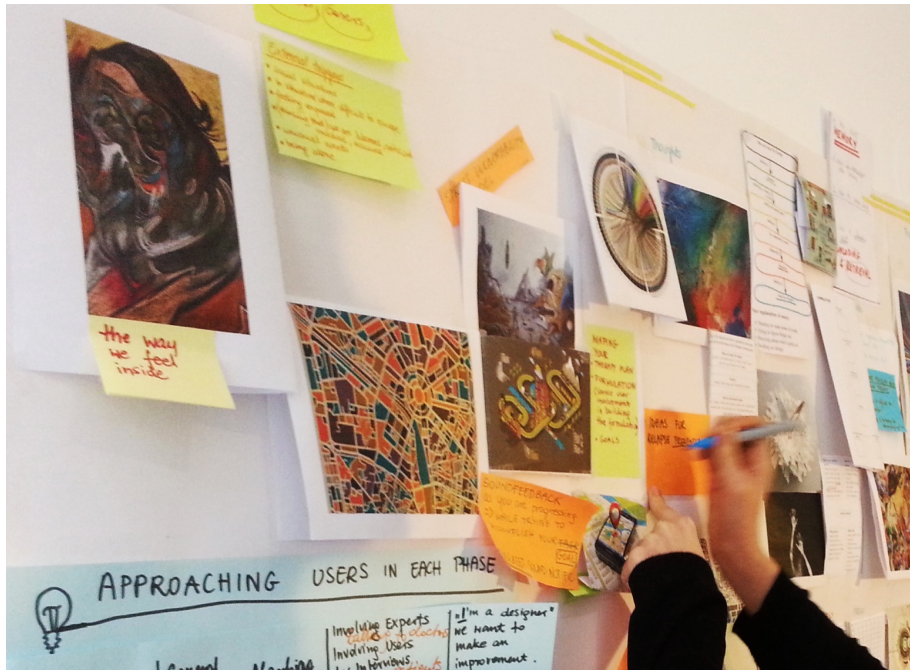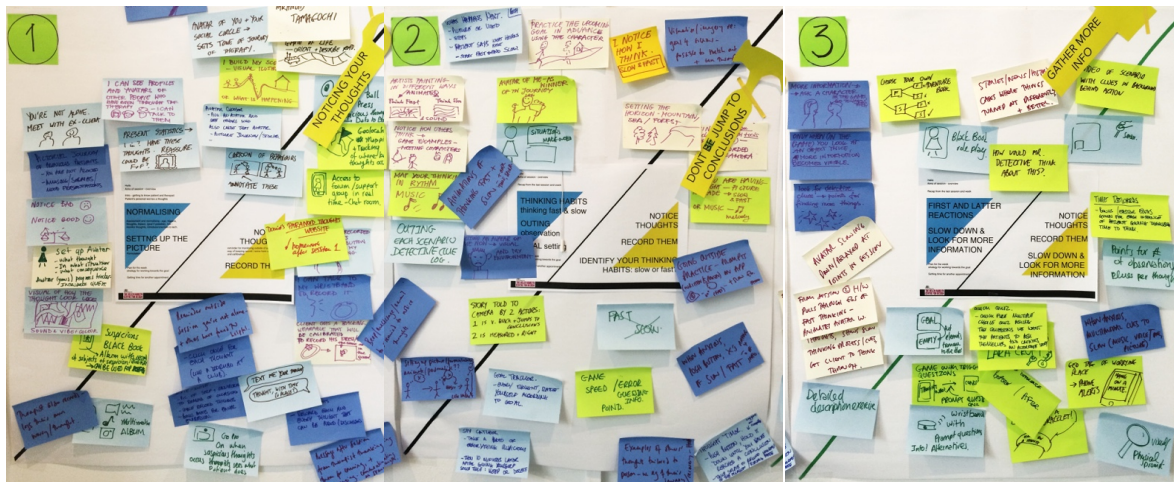

## Concept development.

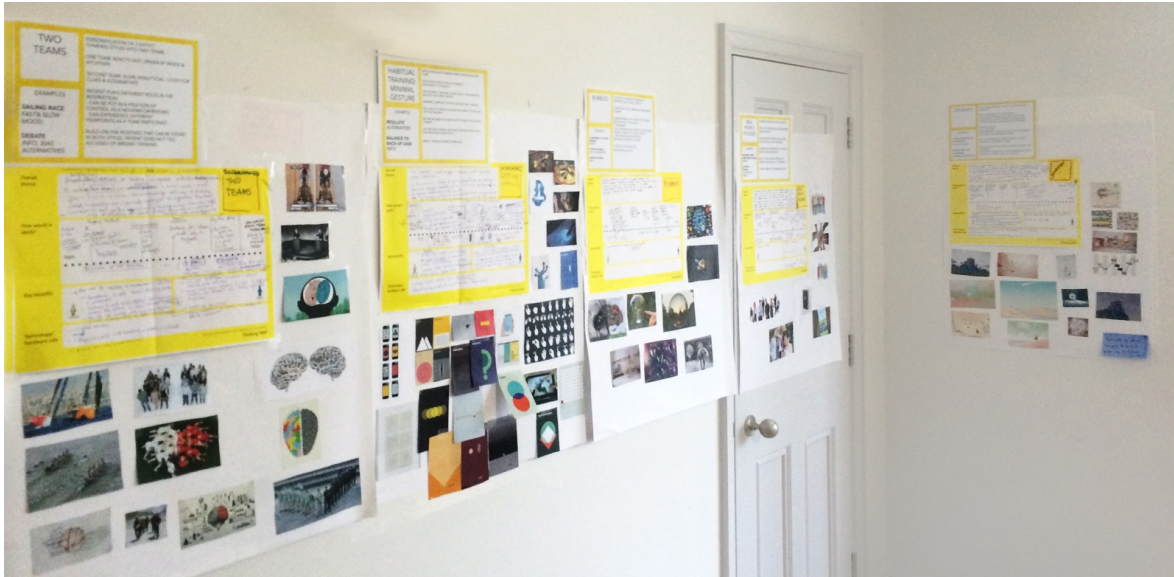

## Concept evaluation.

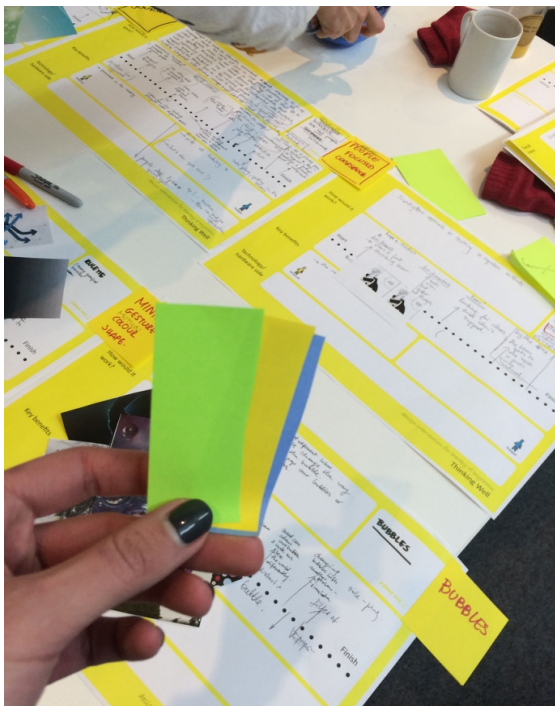

|                              | 6 | 7 | 8 | 9 |
|------------------------------|---|---|---|---|
| EXTRACTS FROM TWO TEAMS      | 6 | 6 | 6 | 6 |
| BUBBLES                      | 8 | 6 | 7 | 7 |
| PEOPLE FOCUSED COURSEBOOK    | 7 | 9 | 4 | 9 |
| JOURNEY                      | 9 | 3 | 9 | 9 |
| BALANCE                      | 5 | 5 | 3 | 3 |
| MINIMAL GESTURE COLOUR SHAPE | 6 | 6 | 3 | 3 |

Narrative prototype testing.

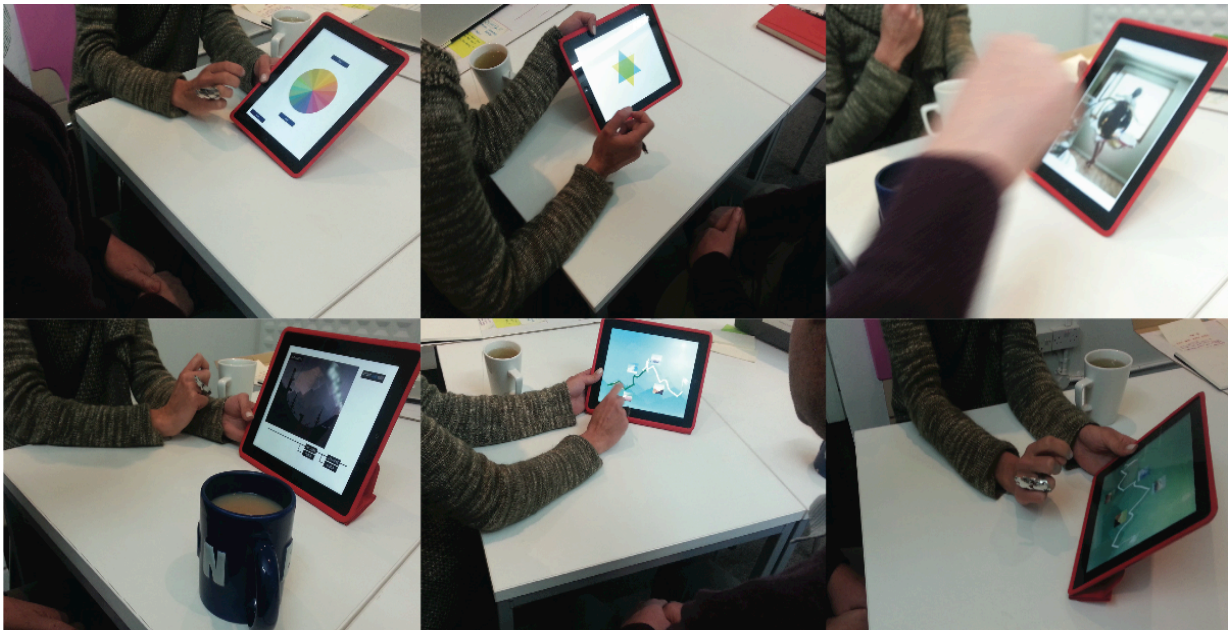

Modality prototype testing.

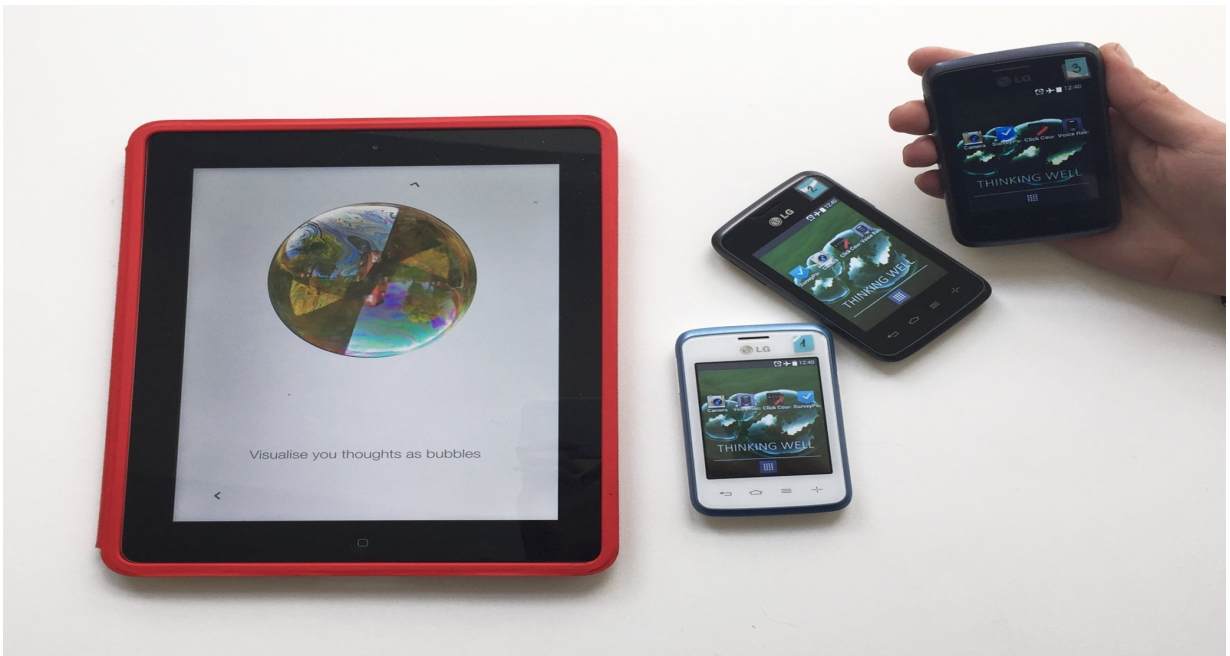

Modality monitoring prototype feedback.

| Theme         | Comments                                                                                                                                                                                                                                                                                                                                                                                                                                                                                                                                                                                                                                                                                                                                                                                                                                                     |
|---------------|--------------------------------------------------------------------------------------------------------------------------------------------------------------------------------------------------------------------------------------------------------------------------------------------------------------------------------------------------------------------------------------------------------------------------------------------------------------------------------------------------------------------------------------------------------------------------------------------------------------------------------------------------------------------------------------------------------------------------------------------------------------------------------------------------------------------------------------------------------------|
| Enjoyment     | <p>I liked doing it, good to have something to do.</p>                                                                                                                                                                                                                                                                                                                                                                                                                                                                                                                                                                                                                                                                                                                                                                                                       |
| Acceptability | <p>It was good because it felt like people were keeping an eye on me and were being protective.</p> <p>I really enjoyed it. Really liked the survey and recorder. Found the recording much easier to just say how I felt.</p> <p>The phone helped me to get my upsetting thoughts out of my head and distract me.</p> <p>I felt better after entering things into the phone about feeling stressed.</p> <p>Sometimes it felt a bit much, needed a bit of space from it but got more used to it.</p> <p>I worried about how secure it was. All the apps were good, voice recorder probably the best.</p> <p>It helped listening to recordings to recognise what is difficult and feel like thoughts are being acknowledged.</p> <p>I wanted to record generally how things were going, have a survey that captures positive as well as negative thoughts.</p> |
| Usability     | <p>It was easy to do. I'm not good with phones but it was all right.</p> <p>I preferred it to writing things down on paper. The phone was 1000x better than having to write things down. The apps are short and to the point. I can answer without having to think too hard.</p> <p>The voice recorder recorded me when I didn't ask it too – not sure if I pressed record by mistake. I got very, very paranoid as a result.</p> <p>The survey didn't work which was very frustrating.</p> <p>It's harder to use the phone when feeling low.</p>                                                                                                                                                                                                                                                                                                            |
